# Supplementary material for: Temporal dynamics in viral shedding and transmissibility of COVID-19
Source: Springer Nature journal article supplement (doi:10.1038/s41591-020-0869-5), 2020-04-15
Supplement: 41591_2020_869_MOESM1_ESM.pdf [file 41591_2020_869_MOESM1_ESM.pdf]

In the format provided by the authors and unedited.

# Temporal dynamics in viral shedding and transmissibility of COVID-19

Xi He<sup>1,3</sup>, Eric H. Y. Lau<sup>2,3</sup>  , Peng Wu<sup>2</sup>, Xilong Deng<sup>1</sup>, Jian Wang<sup>1</sup>, Xinxin Hao<sup>2</sup>, Yiu Chung Lau<sup>2</sup>, Jessica Y. Wong<sup>2</sup>, Yajuan Guan<sup>1</sup>, Xinghua Tan<sup>1</sup>, Xiaoneng Mo<sup>1</sup>, Yanqing Chen<sup>1</sup>, Baolin Liao<sup>1</sup>, Weilie Chen<sup>1</sup>, Fengyu Hu<sup>1</sup>, Qing Zhang<sup>1</sup>, Mingqiu Zhong<sup>1</sup>, Yanrong Wu<sup>1</sup>, Lingzhai Zhao<sup>1</sup>, Fuchun Zhang<sup>1</sup>, Benjamin J. Cowling<sup>2,4</sup> , Fang Li<sup>1,4</sup> and Gabriel M. Leung<sup>2,4</sup> 

---

<sup>1</sup>Guangzhou Eighth People's Hospital, Guangzhou Medical University, Guangzhou, China. <sup>2</sup>World Health Organization Collaborating Centre for Infectious Disease Epidemiology and Control, School of Public Health, University of Hong Kong, Hong Kong, SAR, China. <sup>3</sup>These authors contributed equally: Xi He, Eric H. Y. Lau. <sup>4</sup>These authors jointly supervised this work: Benjamin J. Cowling, Fang Li, Gabriel M. Leung. ✉e-mail: [ehylau@hku.hk](mailto:ehylau@hku.hk)

**Supplementary Table 1. Characteristics of laboratory-confirmed patients infected with SARS-CoV-2 with at least one positive throat swabs (N=94)**

| Characteristics                           | N (%)      |
|-------------------------------------------|------------|
| Male                                      | 47 (50%)   |
| Median age, years (IQR)                   | 46 (33-61) |
| Associated with family clusters           | 46 (49%)   |
| Under home confinement prior to admission | 18 (19%)   |
| Condition on admission (N=93)             |            |
| Asymptomatic <sup>a</sup>                 | 2 (2%)     |
| Mild                                      | 30 (32%)   |
| Moderate                                  | 61 (66%)   |
| Severe                                    | 0 (0%)     |
| Severity during hospitalization           |            |
| Mild                                      | 74 (79%)   |
| Severe                                    | 16 (17%)   |
| Critical                                  | 4 (4%)     |
| Median no. throat swabs (IQR)             | 4 (3-5)    |

<sup>a</sup>Patient 1 was a true asymptomatic confirmed case, who had been placed under quarantine and tested while having remained symptom-free throughout. Patient 2 had experienced fever and

myalgia, thus was tested which came back positive for SARS-CoV-2; but on admission his symptoms had resolved. He was nonetheless classified as an “asymptomatic” case on admission.

**Supplementary Table 2. Details of the infector-infectee transmission pairs (N=77)**

| ID | Location  | Age      | Sex  | Infector(s)                     |                      |                       | Infectee |     |            |
|----|-----------|----------|------|---------------------------------|----------------------|-----------------------|----------|-----|------------|
|    |           |          |      | Date of arrival to the location | Onset date           | Date of contact       | Age      | Sex | Onset date |
| 1  | Vietnam   | 66       | M    | 1/13/2020                       | 1/17/2020            | 1/13/2020             | 28       | M   | 1/20/2020  |
| 2  | Vietnam   | 42       | F    | Local infection                 | 1/31/2020            | 1/28/2020 - 2/1/2020  | 3 (mo)   | F   | 2/6/2020   |
| 3  | Malaysia  | 41       | M    | 1/23/2020                       | 1/29/2020            | 1/23/2020             | 40       | F   | 2/1/2020   |
| 4  | Malaysia  | 41       | M    | 1/23/2020                       | 1/29/2020            | 1/26/2020 - 1/28/2020 | 65       | F   | 2/5/2020   |
| 5  | Hong Kong | 73, 72   | F, M | 1/22/2020                       | 1/25/2020, 1/25/2020 | 1/22/2020 - 1/28/2020 | 37       | F   | 1/28/2020  |
| 6  | Hong Kong | 39       | M    | 1/23/2020                       | 1/29/2020            | 1/23/2020 - 1/31/2020 | 72       | F   | 2/1/2020   |
| 7  | Hong Kong | 68       | M    | Local infection                 | 1/29/2020            |                       | 60       | F   | 2/1/2020   |
| 8  | Hong Kong | 55       | F    | Local infection                 | 1/30/2020            |                       | 51       | M   | 2/3/2020   |
| 9  | Hong Kong | 70       | F    | Local infection                 | 2/12/2020            | frequent              | 68       | M   | 2/12/2020  |
| 10 | Hong Kong | 76       | F    | Local infection                 | 2/13/2020            | frequent              | 80       | M   | 2/25/2020  |
| 11 | Hong Kong | 70       | F    | Local infection                 | 2/13/2020            | frequent              | 46       | F   | 2/29/2020  |
| 12 | Hong Kong | 60       | F    | Local infection                 | 2/12/2020            | frequent              | 29       | F   | 2/16/2020  |
| 13 | Japan     | 60+      | F    | 2/7/2020                        | 2/13/2020            | after 2/7/2020        | 60+      | M   | 2/15/2020  |
| 14 | Japan     | 60+      | F    | 2/7/2020                        | 2/13/2020            | after 2/7/2020        | 50+      | F   | 2/17/2020  |
| 15 | Japan     | 50+      | F    | Local infection                 | 2/17/2020            |                       | 60+      | M   | 2/19/2020  |
| 16 | Japan     | 50+      | F    | Local infection                 | 2/17/2020            |                       | 60+      | M   | 2/19/2020  |
| 17 | Japan     | 60+      | M    | Local infection                 | 2/15/2020            | 2/14/2020             | 60+      | M   | 2/17/2020  |
| 18 | Japan     | 60+      | M    | Local infection                 | 2/15/2020            | 2/14/2020             | 60+      | M   | 2/17/2020  |
| 19 | Japan     | 50+      | M    | Local infection                 | 2/20/2020            |                       | 50+      | M   | 2/20/2020  |
| 20 | Japan     | 60+      | M    | Local infection                 | 2/3/2020             |                       | 50+      | F   | 2/17/2020  |
| 21 | Japan     | 80+, 70+ | M, F | Local infection                 | 2/9/2020, 2/3/2020   | 2/13/2020 - 2/15/2020 | 20+      | F   | 2/24/2020  |

|    |           |           |         |                 |                                             |                          |     |   |           |
|----|-----------|-----------|---------|-----------------|---------------------------------------------|--------------------------|-----|---|-----------|
| 22 | Japan     | 30+       | F       | Local infection | 2/13/2020                                   | frequent                 | 60+ | F | 2/25/2020 |
| 23 | Taiwan    | 52        | F       | 1/20/2020       | 1/25/2020                                   | since<br>1/20/2020       | 50  | M | 1/26/2020 |
| 24 | Taiwan    | 40+       | M       | 1/12/2020       | 1/21/2020                                   | since<br>1/12/2020       | 40+ | F | 1/27/2020 |
| 25 | Taiwan    | 80+       | M       | Local infection | 2/6/2020                                    | 2/11/2020 -<br>2/16/2020 | 31  | F | 2/24/2020 |
| 26 | Chicago   | 60+       | F       | 1/13/2020       | 1/22/2020 -<br>1/23/2020                    | since<br>1/13/2020       | 60+ | M | 1/28/2020 |
| 27 | Singapore | 73, 42    | F, F    | 1/21/2020       | 1/28/2020                                   |                          | 37  | M | 1/31/2020 |
| 28 | Shenzhen  | 64, 71    | F, M    | 1/12/2020       | 1/12/2020, 1/15/2020                        |                          | 38  | F | 1/22/2020 |
| 29 | Shenzhen  | 30, 62, 2 | F, F, F | 1/21/2020       | 1/22/2020,<br>asymptomatic,<br>asymptomatic |                          | 38  | F | 1/28/2020 |
| 30 | Shenzhen  | 64        | M       | 1/17/2020       | 1/18/2020                                   | since<br>1/17/2020       | 37  | M | 1/24/2020 |
| 31 | Shenzhen  | 64, 69    | F, M    | 1/15/2020       | 1/4/2020, 1/12/2020                         | 1/15/2020 -<br>1/19/2020 | 25  | F | 1/25/2020 |
| 32 | Shenzhen  | 59, 61    | F, M    | 1/21/2020       | 1/24/2020, 1/24/2020                        |                          | 34  | F | 1/25/2020 |
| 33 | Shenzhen  | 64        | F       | 1/22/2020       | 1/17/2020                                   |                          | 37  | F | 1/28/2020 |
| 34 | Shenzhen  | 78        | M       | 1/16/2020       | 1/26/2020                                   | 1/16/2020                | 78  | F | 1/30/2020 |
| 35 | Shenzhen  | 62        | F       | 1/22/200        | 1/19/2020                                   | 1/22/2020 -<br>1/24/2020 | 33  | F | 2/4/2020  |
| 36 | Shenzhen  | 66        | M       | Local infection | 1/29/2020                                   |                          | 60  | F | 2/5/2020  |
| 37 | Hefei     | 50        | F       | 1/7/2020        | 1/10/2020                                   |                          | 40  | F | 1/15/2020 |
| 38 | Hefei     | 50        | F       | 1/7/2020        | 1/10/2020                                   |                          | 51  | M | 1/17/2020 |
| 39 | Hefei     | 40        | F       | Local infection | 1/15/2020                                   |                          | 40  | M | 1/24/2020 |
| 40 | Hefei     | 22        | M       | 1/19/2020       | 1/22/2020                                   | 1/21/2020                | 22  | M | 1/24/2020 |
| 41 | Hefei     | 22        | M       | 1/19/2020       | 1/22/2020                                   | 1/21/2020                | 22  | M | 1/25/2020 |
| 42 | Hefei     | 22        | M       | 1/19/2020       | 1/22/2020                                   | 1/21/2020                | 22  | M | 1/24/2020 |
| 43 | Hefei     | 22        | M       | 1/19/2020       | 1/22/2020                                   | 1/21/2020                | 24  | M | 1/22/2020 |
| 44 | Hefei     | 22        | M       | 1/19/2020       | 1/22/2020                                   | 1/21/2020                | 22  | M | 1/24/2020 |
| 45 | Nanyang   | 57        | M       | Local infection | 1/25/2020                                   |                          | 56  | F | 2/3/2020  |

|    |         |               |            |                           |                                    |                          |    |   |           |
|----|---------|---------------|------------|---------------------------|------------------------------------|--------------------------|----|---|-----------|
| 46 | Nanyang | 48            | M          | Local infection           | 1/29/2020                          | 1/25/2020                | 37 | F | 2/1/2020  |
| 47 | Nanyang | 48            | M          | Local infection           | 1/29/2020                          | 1/25/2020                | 35 | M | 2/6/2020  |
| 48 | Nanyang | 37            | M          | Local infection           | 1/29/2020                          |                          | 35 | F | 2/3/2020  |
| 49 | Nanyang | 23            | F          | 1/22/2020                 | 1/23/2020                          | 1/22/2020 -<br>1/23/2020 | 74 | M | 2/3/2020  |
| 50 | Nanyang | 29            | M          |                           | 1/30/2020                          |                          | 59 | F | 2/2/2020  |
| 51 | Nanyang | 59, 53        | M, F       | Local infection           | 1/14/2020, 1/15/2020               | 1/20/2020                | 56 | F | 1/24/2020 |
| 52 | Nanyang | 56            | F          | Local infection           | 1/24/2020                          |                          | 59 | F | 2/1/2020  |
| 53 | Nanyang | 57            | M          | 11/27/2019 -<br>1/18/2020 | 1/17/2020                          |                          | 50 | F | 1/31/2020 |
| 54 | Nanyang | 70            | F          |                           | 1/22/2020                          | 1/18/2020                | 58 | M | 1/19/2020 |
| 55 | Shaanxi | 32            | F          | 1/14/2020                 | 1/16/2020                          |                          | 32 | F | 1/25/2020 |
| 56 | Shaanxi | 46            | F          | Local infection           | 1/18/2020                          | frequently               | 50 | M | 1/22/2020 |
| 57 | Shaanxi | 40            | F          | 1/17/2020                 | 1/18/2020                          |                          | 46 | F | 1/22/2020 |
| 58 | Shaanxi | 66            | M          | Local infection           | 1/18/2020                          |                          | 32 | M | 1/25/2020 |
| 59 | Shaanxi | 66            | M          | Local infection           | 1/18/2020                          |                          | 35 | F | 1/25/2020 |
| 60 | Shaanxi | 64            | M          | Local infection           | 1/29/2020                          |                          | 71 | M | 2/3/2020  |
| 61 | Shaanxi | 46, 45, 9, 70 | M, M, F, F | 1/20/2020                 | 1/23/2020,<br>1/21/2020, 1/23/2020 |                          | 74 | M | 1/27/2020 |
| 62 | Shaanxi | 46, 45, 9, 70 | M, M, F, F | 1/20/2020                 | 1/23/2020,<br>1/21/2020, 1/23/2020 |                          | 76 | F | 1/27/2020 |
| 63 | Shaanxi | 62, 64        | M, F       | 1/14/2020                 | 1/26/2020-<br>1/29/2020, 1/10/2020 |                          | 34 | F | 1/22/2020 |
| 64 | Shaanxi | 49            | F          | 1/17/2020                 | 1/24/2020                          |                          | 47 | F | 1/25/2020 |
| 65 | Shaanxi | 49            | F          | 1/17/2020                 | 1/24/2020                          |                          | 50 | F | 1/31/2020 |
| 66 | Shaanxi | 13, 45        | M, F       | 1/20/2020, 1/22/2020      | 1/26/2020, 1/23/2020               |                          | 54 | M | 1/30/2020 |
| 67 | Shaanxi | 54            | M          | Local infection           | 1/30/2020                          |                          | 53 | F | 2/1/2020  |
| 68 | Shaanxi | 40            | M          | 1/18/2020                 | 1/28/2020                          |                          | 33 | M | 1/24/2020 |
| 69 | Shaanxi | 65, 64        | M, F       | 1/21/2020                 | 1/26/2020,<br>asymptomatic         |                          | 33 | F | 2/2/2020  |

|    |          |                |            |                 |                                                              |                         |     |   |           |
|----|----------|----------------|------------|-----------------|--------------------------------------------------------------|-------------------------|-----|---|-----------|
| 70 | Shaanxi  | 3, 32, 35, 57  | F, F, M, M | 1/22/2020       | 1/27/2020,<br>asymptomatic,<br>asymptomatic,<br>asymptomatic |                         | 56  | F | 1/31/2020 |
| 71 | Shaanxi  | 62             | F          | 1/22/2020       | 1/24/2020                                                    |                         | 66  | M | 2/1/2020  |
| 72 | Shaanxi  | 39, 65         | F, M       | 1/20/2020       | 1/28/2020, 2/3/2020                                          |                         | 66  | F | 2/8/2020  |
| 73 | Shaanxi  | 89             | M          | Local infection | 2/9/2020                                                     |                         | 56  | F | 2/12/2020 |
| 74 | Shenzhen | 65, 66, 37, 36 | F, M, F, M | 1/4/2020        | 1/1/2020 - 1/4/2020                                          |                         | 63  | F | 1/8/2020  |
| 75 | Japan    | 40+            | M          | Local infection | 2/24/2020                                                    | frequently              | 70+ | F | 2/29/2020 |
| 76 | Japan    | 50+            | M          | Local infection | 2/29/2020                                                    | frequently              | 40+ | F | 3/4/2020  |
| 77 | Taiwan   | 60+            | F          | 2/21/2020       | 2/20/2020                                                    | 2/24/2020-<br>2/25/2020 | 50+ | F | 3/3/2020  |

42/77 (54%) of the cases belonged to family clusters. 37/77 (48%) of the cases belonged to household clusters. 1 (2%) of 53 cases with available information were under home confinement prior to hospitalization.

**Supplementary Table 3. Source of information for the infector-infectee pairs (N=77)**

| ID | Source of information                                                                                                                                                                                                                                                                                                                                                                                                                                                                                                                                                                                                                                                                                                                                                                                                                                                                                                                                                                                                                                     |
|----|-----------------------------------------------------------------------------------------------------------------------------------------------------------------------------------------------------------------------------------------------------------------------------------------------------------------------------------------------------------------------------------------------------------------------------------------------------------------------------------------------------------------------------------------------------------------------------------------------------------------------------------------------------------------------------------------------------------------------------------------------------------------------------------------------------------------------------------------------------------------------------------------------------------------------------------------------------------------------------------------------------------------------------------------------------------|
| 1  | <a href="http://www.81.cn/gjzx/2020-01/24/content_9724683.htm?clicktime=1579941590">http://www.81.cn/gjzx/2020-01/24/content_9724683.htm?clicktime=1579941590</a>                                                                                                                                                                                                                                                                                                                                                                                                                                                                                                                                                                                                                                                                                                                                                                                                                                                                                         |
| 2  | <a href="https://vietnamnet.vn/vn/suc-khoe/suc-khoe-24h/ca-thu-15-nhiem-virus-corona-tai-viet-nam-la-be-gai-3-thang-o-vinh-phuc-615406.html">https://vietnamnet.vn/vn/suc-khoe/suc-khoe-24h/ca-thu-15-nhiem-virus-corona-tai-viet-nam-la-be-gai-3-thang-o-vinh-phuc-615406.html</a>                                                                                                                                                                                                                                                                                                                                                                                                                                                                                                                                                                                                                                                                                                                                                                       |
| 3  | <p data-bbox="191 456 1944 542"><a href="https://www.chinapress.com.my/20200206/%e2%97%a4%e6%ad%a6%e6%b1%89%e8%82%ba%e7%82%8e%e2%97%a2-%e7%a1%ae%e8%af%8a%e5%86%8d%e6%b7%bb2%e4%ba%ba-1%e6%82%a3%e8%80%85%e6%98%af%e9%a6%96%e5%90%8d%e7%a1%ae%e8%af%8a%e7%97%85%e6%82%a3%e5%a6%b9/">https://www.chinapress.com.my/20200206/%e2%97%a4%e6%ad%a6%e6%b1%89%e8%82%ba%e7%82%8e%e2%97%a2-%e7%a1%ae%e8%af%8a%e5%86%8d%e6%b7%bb2%e4%ba%ba-1%e6%82%a3%e8%80%85%e6%98%af%e9%a6%96%e5%90%8d%e7%a1%ae%e8%af%8a%e7%97%85%e6%82%a3%e5%a6%b9/</a></p> <p data-bbox="191 579 701 607"><a href="https://www.malaysiakini.com/news/509509">https://www.malaysiakini.com/news/509509</a></p>                                                                                                                                                                                                                                                                                                                                                                                  |
| 4  | <p data-bbox="191 626 1944 712"><a href="https://zh.wikipedia.org/wiki/2019%E5%86%A0%E7%8B%80%E7%97%85%E6%AF%92%E7%97%85%E9%A6%AC%E4%BE%86%E8%A5%BF%E4%BA%9E%E7%96%AB%E6%83%85%E7%A2%BA%E8%A8%BA%E5%80%8B%E6%A1%88%E9%97%9C%E8%81%AF%E7%BE%A4%E7%B5%84">https://zh.wikipedia.org/wiki/2019%E5%86%A0%E7%8B%80%E7%97%85%E6%AF%92%E7%97%85%E9%A6%AC%E4%BE%86%E8%A5%BF%E4%BA%9E%E7%96%AB%E6%83%85%E7%A2%BA%E8%A8%BA%E5%80%8B%E6%A1%88%E9%97%9C%E8%81%AF%E7%BE%A4%E7%B5%84</a></p> <p data-bbox="191 734 894 761"><a href="https://www.sinchew.com.my/content/content_2214101.html">https://www.sinchew.com.my/content/content_2214101.html</a></p> <p data-bbox="191 773 701 802"><a href="https://www.malaysiakini.com/news/509509">https://www.malaysiakini.com/news/509509</a></p>                                                                                                                                                                                                                                                                         |
| 5  | <p data-bbox="191 818 999 846"><a href="https://www.info.gov.hk/gia/general/202001/29/P2020012900784.htm">https://www.info.gov.hk/gia/general/202001/29/P2020012900784.htm</a></p> <p data-bbox="191 857 999 883"><a href="https://www.info.gov.hk/gia/general/202001/31/P2020013100014.htm">https://www.info.gov.hk/gia/general/202001/31/P2020013100014.htm</a></p>                                                                                                                                                                                                                                                                                                                                                                                                                                                                                                                                                                                                                                                                                     |
| 6  | <p data-bbox="191 899 999 927"><a href="https://www.info.gov.hk/gia/general/202002/02/P2020020200626.htm">https://www.info.gov.hk/gia/general/202002/02/P2020020200626.htm</a></p> <p data-bbox="191 933 999 964"><a href="https://www.info.gov.hk/gia/general/202001/31/P2020013100794.htm">https://www.info.gov.hk/gia/general/202001/31/P2020013100794.htm</a></p>                                                                                                                                                                                                                                                                                                                                                                                                                                                                                                                                                                                                                                                                                     |
| 7  | <a href="https://www.info.gov.hk/gia/general/202002/11/P2020021100729.htm">https://www.info.gov.hk/gia/general/202002/11/P2020021100729.htm</a>                                                                                                                                                                                                                                                                                                                                                                                                                                                                                                                                                                                                                                                                                                                                                                                                                                                                                                           |
| 8  | <p data-bbox="191 1058 1944 1144"><a href="https://www.hk01.com/%E7%A4%BE%E6%9C%83%E6%96%B0%E8%81%9E/429385/%E6%AD%A6%E6%BC%A2%E8%82%BA%E7%82%8E-%E6%9C%80%E6%96%B0-%E9%A6%99%E6%B8%AF%E7%A2%BA%E8%A8%BA%E7%AA%81%E7%A0%B4%E7%99%BE%E5%AE%97-%E5%8C%97%E8%A7%92%E4%BD%9B%E5%A0%82%E7%BE%A4%E7%B5%84%E5%85%B116%E5%90%8D%E6%82%A3%E8%80%85">https://www.hk01.com/%E7%A4%BE%E6%9C%83%E6%96%B0%E8%81%9E/429385/%E6%AD%A6%E6%BC%A2%E8%82%BA%E7%82%8E-%E6%9C%80%E6%96%B0-%E9%A6%99%E6%B8%AF%E7%A2%BA%E8%A8%BA%E7%AA%81%E7%A0%B4%E7%99%BE%E5%AE%97-%E5%8C%97%E8%A7%92%E4%BD%9B%E5%A0%82%E7%BE%A4%E7%B5%84%E5%85%B116%E5%90%8D%E6%82%A3%E8%80%85</a></p> <p data-bbox="191 1221 1944 1279"><a href="https://zh.wikipedia.org/wiki/2019%E5%86%A0%E7%8B%80%E7%97%85%E6%AF%92%E7%97%85%E9%A6%99%E6%B8%AF%E7%96%AB%E6%83%85%E7%A2%BA%E8%A8%BA%E5%80%8B%E6%A1%88%E7%97%85%E6%83%85">https://zh.wikipedia.org/wiki/2019%E5%86%A0%E7%8B%80%E7%97%85%E6%AF%92%E7%97%85%E9%A6%99%E6%B8%AF%E7%96%AB%E6%83%85%E7%A2%BA%E8%A8%BA%E5%80%8B%E6%A1%88%E7%97%85%E6%83%85</a></p> |



<https://www.hk01.com/%E7%A4%BE%E6%9C%83%E6%96%B0%E8%81%9E/429385/%E6%AD%A6%E6%BC%A2%E8%82%BA%E7%82%8E-%E6%9C%80%E6%96%B0-%E9%A6%99%E6%B8%AF%E7%A2%BA%E8%A8%BA%E7%AA%81%E7%A0%B4%E7%99%BE%E5%AE%97-%E5%8C%97%E8%A7%92%E4%BD%9B%E5%A0%82%E7%BE%A4%E7%B5%84%E5%85%B116%E5%90%8D%E6%82%A3%E8%80%85>

<https://www.info.gov.hk/gia/general/202002/12/P2020021200706.htm>

9 <https://zh.wikipedia.org/wiki/2019%E5%86%A0%E7%8B%80%E7%97%85%E6%AF%92%E7%97%85%E9%A6%99%E6%B8%AF%E7%96%AB%E6%83%85%E7%A2%BA%E8%A8%BA%E5%80%8B%E6%A1%88%E7%97%85%E6%83%85>

<https://news.ltn.com.tw/news/world/breakingnews/3073369>

<https://www.info.gov.hk/gia/general/202002/19/P2020021900675.htm>

10 <https://zh.wikipedia.org/wiki/2019%E5%86%A0%E7%8B%80%E7%97%85%E6%AF%92%E7%97%85%E9%A6%99%E6%B8%AF%E7%96%AB%E6%83%85%E7%A2%BA%E8%A8%BA%E5%80%8B%E6%A1%88%E7%97%85%E6%83%85>

<https://www.info.gov.hk/gia/general/202002/23/P2020022300683.htm>

11 <https://www.passiontimes.hk/article/02-29-2020/60475>

<https://hk.appledaily.com/local/20200227/ZLLNWP5SYF2VZMT2ZAC7WEVOJQ/>

<https://www.info.gov.hk/gia/general/202002/29/P2020022900785.htm>

12 <https://zh.wikipedia.org/wiki/2019%E5%86%A0%E7%8B%80%E7%97%85%E6%AF%92%E7%97%85%E9%A6%99%E6%B8%AF%E7%96%AB%E6%83%85%E7%A2%BA%E8%A8%BA%E5%80%8B%E6%A1%88%E7%97%85%E6%83%85>

<https://www.soundofhope.org/post/348103>

<https://www.info.gov.hk/gia/general/202002/26/P2020022600819.htm>

13 [https://zh.wikipedia.org/wiki/2019%E5%86%A0%E7%8A%B6%E7%97%85%E6%AF%92%E7%97%85%E6%97%A5%E6%9C%AC%E5%9B%BD%E5%86%85%E7%97%85%E4%BE%8B\\_\(2020%E5%B9%B4%E6%9C%88%E5%8F%8A2%E6%9C%88\)](https://zh.wikipedia.org/wiki/2019%E5%86%A0%E7%8A%B6%E7%97%85%E6%AF%92%E7%97%85%E6%97%A5%E6%9C%AC%E5%9B%BD%E5%86%85%E7%97%85%E4%BE%8B_(2020%E5%B9%B4%E6%9C%88%E5%8F%8A2%E6%9C%88))

<https://www.asahi.com/articles/ASN2H6STTN2HOIPE00H.html>

[https://news.tv-asahi.co.jp/news\\_society/articles/000176424.html](https://news.tv-asahi.co.jp/news_society/articles/000176424.html)

14 [https://zh.wikipedia.org/wiki/2019%E5%86%A0%E7%8A%B6%E7%97%85%E6%AF%92%E7%97%85%E6%97%A5%E6%9C%AC%E5%9B%BD%E5%86%85%E7%97%85%E4%BE%8B\\_\(2020%E5%B9%B4%E6%9C%88%E5%8F%8A2%E6%9C%88\)](https://zh.wikipedia.org/wiki/2019%E5%86%A0%E7%8A%B6%E7%97%85%E6%AF%92%E7%97%85%E6%97%A5%E6%9C%AC%E5%9B%BD%E5%86%85%E7%97%85%E4%BE%8B_(2020%E5%B9%B4%E6%9C%88%E5%8F%8A2%E6%9C%88))

<https://www.asahi.com/articles/ASN2H6STTN2HOIPE00H.html>

- <https://www3.nhk.or.jp/news/html/20200219/k10012292821000.html>
- 15 [https://zh.wikipedia.org/wiki/2019%E5%86%A0%E7%8A%B6%E7%97%85%E6%AF%92%E7%97%85%E6%97%A5%E6%9C%AC%E5%9B%BD%E5%86%85%E7%97%85%E4%BE%8B\\_\(2020%E5%B9%B41%E6%9C%88%E5%8F%8A2%E6%9C%88\)](https://zh.wikipedia.org/wiki/2019%E5%86%A0%E7%8A%B6%E7%97%85%E6%AF%92%E7%97%85%E6%97%A5%E6%9C%AC%E5%9B%BD%E5%86%85%E7%97%85%E4%BE%8B_(2020%E5%B9%B41%E6%9C%88%E5%8F%8A2%E6%9C%88))
- <https://www3.nhk.or.jp/news/html/20200222/k10012297571000.html>
- 16 [https://zh.wikipedia.org/wiki/2019%E5%86%A0%E7%8A%B6%E7%97%85%E6%AF%92%E7%97%85%E6%97%A5%E6%9C%AC%E5%9B%BD%E5%86%85%E7%97%85%E4%BE%8B\\_\(2020%E5%B9%B41%E6%9C%88%E5%8F%8A2%E6%9C%88\)](https://zh.wikipedia.org/wiki/2019%E5%86%A0%E7%8A%B6%E7%97%85%E6%AF%92%E7%97%85%E6%97%A5%E6%9C%AC%E5%9B%BD%E5%86%85%E7%97%85%E4%BE%8B_(2020%E5%B9%B41%E6%9C%88%E5%8F%8A2%E6%9C%88))
- <https://www3.nhk.or.jp/news/html/20200222/k10012297571000.html>
- 17 [https://zh.wikipedia.org/wiki/2019%E5%86%A0%E7%8A%B6%E7%97%85%E6%AF%92%E7%97%85%E6%97%A5%E6%9C%AC%E5%9B%BD%E5%86%85%E7%97%85%E4%BE%8B\\_\(2020%E5%B9%B41%E6%9C%88%E5%8F%8A2%E6%9C%88\)](https://zh.wikipedia.org/wiki/2019%E5%86%A0%E7%8A%B6%E7%97%85%E6%AF%92%E7%97%85%E6%97%A5%E6%9C%AC%E5%9B%BD%E5%86%85%E7%97%85%E4%BE%8B_(2020%E5%B9%B41%E6%9C%88%E5%8F%8A2%E6%9C%88))
- <https://www3.nhk.or.jp/news/html/20200216/k10012288191000.html>
- [https://news.tv-asahi.co.jp/news\\_society/articles/000176424.html](https://news.tv-asahi.co.jp/news_society/articles/000176424.html)
- <https://www3.nhk.or.jp/news/html/20200217/k10012289781000.html>
- 18 [https://zh.wikipedia.org/wiki/2019%E5%86%A0%E7%8A%B6%E7%97%85%E6%AF%92%E7%97%85%E6%97%A5%E6%9C%AC%E5%9B%BD%E5%86%85%E7%97%85%E4%BE%8B\\_\(2020%E5%B9%B41%E6%9C%88%E5%8F%8A2%E6%9C%88\)](https://zh.wikipedia.org/wiki/2019%E5%86%A0%E7%8A%B6%E7%97%85%E6%AF%92%E7%97%85%E6%97%A5%E6%9C%AC%E5%9B%BD%E5%86%85%E7%97%85%E4%BE%8B_(2020%E5%B9%B41%E6%9C%88%E5%8F%8A2%E6%9C%88))
- <https://www.mhlw.go.jp/content/10906000/000597568.pdf>
- 19 [https://zh.wikipedia.org/wiki/2019%E5%86%A0%E7%8A%B6%E7%97%85%E6%AF%92%E7%97%85%E6%97%A5%E6%9C%AC%E5%9B%BD%E5%86%85%E7%97%85%E4%BE%8B\\_\(2020%E5%B9%B41%E6%9C%88%E5%8F%8A2%E6%9C%88\)](https://zh.wikipedia.org/wiki/2019%E5%86%A0%E7%8A%B6%E7%97%85%E6%AF%92%E7%97%85%E6%97%A5%E6%9C%AC%E5%9B%BD%E5%86%85%E7%97%85%E4%BE%8B_(2020%E5%B9%B41%E6%9C%88%E5%8F%8A2%E6%9C%88))
- <https://www3.nhk.or.jp/news/html/20200225/k10012299631000.html>
- <https://www3.nhk.or.jp/news/html/20200221/k10012296691000.html>
- 20 [https://zh.wikipedia.org/wiki/2019%E5%86%A0%E7%8A%B6%E7%97%85%E6%AF%92%E7%97%85%E6%97%A5%E6%9C%AC%E5%9B%BD%E5%86%85%E7%97%85%E4%BE%8B\\_\(2020%E5%B9%B41%E6%9C%88%E5%8F%8A2%E6%9C%88\)](https://zh.wikipedia.org/wiki/2019%E5%86%A0%E7%8A%B6%E7%97%85%E6%AF%92%E7%97%85%E6%97%A5%E6%9C%AC%E5%9B%BD%E5%86%85%E7%97%85%E4%BE%8B_(2020%E5%B9%B41%E6%9C%88%E5%8F%8A2%E6%9C%88))
- <https://www3.nhk.or.jp/news/html/20200222/k10012297291000.html>
- 21 [https://zh.wikipedia.org/wiki/2019%E5%86%A0%E7%8A%B6%E7%97%85%E6%AF%92%E7%97%85%E6%97%A5%E6%9C%AC%E5%9B%BD%E5%86%85%E7%97%85%E4%BE%8B\\_\(2020%E5%B9%B41%E6%9C%88%E5%8F%8A2%E6%9C%88\)](https://zh.wikipedia.org/wiki/2019%E5%86%A0%E7%8A%B6%E7%97%85%E6%AF%92%E7%97%85%E6%97%A5%E6%9C%AC%E5%9B%BD%E5%86%85%E7%97%85%E4%BE%8B_(2020%E5%B9%B41%E6%9C%88%E5%8F%8A2%E6%9C%88))
- <https://www3.nhk.or.jp/news/html/20200229/k10012308071000.html>

- 22 [https://zh.wikipedia.org/wiki/2019%E5%86%A0%E7%8A%B6%E7%97%85%E6%AF%92%E7%97%85%E6%97%A5%E6%9C%AC%E5%9B%BD%E5%86%85%E7%97%85%E4%BE%8B\\_\(2020%E5%B9%B43%E6%9C%88%E4%B8%8A%E6%97%AC\)](https://zh.wikipedia.org/wiki/2019%E5%86%A0%E7%8A%B6%E7%97%85%E6%AF%92%E7%97%85%E6%97%A5%E6%9C%AC%E5%9B%BD%E5%86%85%E7%97%85%E4%BE%8B_(2020%E5%B9%B43%E6%9C%88%E4%B8%8A%E6%97%AC))  
<https://www3.nhk.or.jp/news/html/20200229/k10012308061000.html>  
<https://www3.nhk.or.jp/news/html/20200301/k10012308951000.html>
- 23 <https://zh.wikipedia.org/wiki/%E5%9A%B4%E9%87%8D%E7%89%B9%E6%AE%8A%E5%82%B3%E6%9F%93%E6%80%A7%E8%82%BA%E7%82%8E%E8%87%BA%E7%81%A3%E5%80%8B%E6%A1%88%E7%B0%A1%E8%A1%A8>  
<https://heho.com.tw/archives/65879?>
- 24 <https://zh.wikipedia.org/wiki/%E5%9A%B4%E9%87%8D%E7%89%B9%E6%AE%8A%E5%82%B3%E6%9F%93%E6%80%A7%E8%82%BA%E7%82%8E%E8%87%BA%E7%81%A3%E5%80%8B%E6%A1%88%E7%B0%A1%E8%A1%A8>  
<https://heho.com.tw/archives/65879>  
<https://www.facebook.com/twreporter/posts/2529295610651629/>
- 25 <https://zh.wikipedia.org/wiki/%E5%9A%B4%E9%87%8D%E7%89%B9%E6%AE%8A%E5%82%B3%E6%9F%93%E6%80%A7%E8%82%BA%E7%82%8E%E8%87%BA%E7%81%A3%E5%80%8B%E6%A1%88%E7%B0%A1%E8%A1%A8>  
<http://www.chinanews.com/tw/2020/02-26/9105788.shtml>
- 26 <https://web.archive.org/web/20200207213504/https://www.chicagotribune.com/news/breaking/ct-coronavirus-illinois-couple-released-hospital-20200207-d7daxrlhbkkldv3buxij4tepa-story.html>  
<https://news.yibada.com/article--335576-1-1.html>  
[https://www.thelancet.com/journals/lancet/article/PIIS0140-6736\(20\)30607-3/fulltext](https://www.thelancet.com/journals/lancet/article/PIIS0140-6736(20)30607-3/fulltext)
- 27 <https://www.moh.gov.sg/news-highlights/details/one-more-case-discharged-two-new-cases-of-novel-coronavirus-infection-confirmed-10feb>  
<https://www.moh.gov.sg/news-highlights/details/six-more-cases-discharged-three-new-cases-of-covid-19-infection-confirmed>
- 28 [http://static.scms.sztv.com.cn/ysz/zx/tj/28428494.shtml?title=%E6%B7%B1%E5%9C%B3%E7%A1%AE%E8%AF%8A%E7%97%85%E4%BE%8B%E4%B8%AA%E6%A1%88%E6%B1%87%E6%80%BB%EF%BC%881-379%EF%BC%89&articleid=28428494&type=1&tag=1&url=http://static.scms.sztv.com.cn/ysz/zx/tj/28428494.shtml&logo=http://static.scms.sztv.com.cn/ysz/upload/Image/mrtp/2020/02/03/1\\_e12d3ec98ac24d879dbb9cca87d6f562.jpg&share=true](http://static.scms.sztv.com.cn/ysz/zx/tj/28428494.shtml?title=%E6%B7%B1%E5%9C%B3%E7%A1%AE%E8%AF%8A%E7%97%85%E4%BE%8B%E4%B8%AA%E6%A1%88%E6%B1%87%E6%80%BB%EF%BC%881-379%EF%BC%89&articleid=28428494&type=1&tag=1&url=http://static.scms.sztv.com.cn/ysz/zx/tj/28428494.shtml&logo=http://static.scms.sztv.com.cn/ysz/upload/Image/mrtp/2020/02/03/1_e12d3ec98ac24d879dbb9cca87d6f562.jpg&share=true)  
[http://wjw.sz.gov.cn/yqxx/202001/t20200129\\_18993020.htm](http://wjw.sz.gov.cn/yqxx/202001/t20200129_18993020.htm)

29 [http://static.scms.sztv.com.cn/ysz/zx/tj/28428494.shtml?title=%E6%B7%B1%E5%9C%B3%E7%A1%AE%E8%AF%8A%E7%97%85%E4%BE%8B%E4%B8%AA%E6%A1%88%E6%B1%87%E6%80%BB%EF%BC%881-379%EF%BC%89&articleid=28428494&type=1&tag=1&url=http://static.scms.sztv.com.cn/ysz/zx/tj/28428494.shtml&logo=http://static.scms.sztv.com.cn/ysz/upload/Image/mrtp/2020/02/03/1\\_e12d3ec98ac24d879dbb9cca87d6f562.jpg&share=true](http://static.scms.sztv.com.cn/ysz/zx/tj/28428494.shtml?title=%E6%B7%B1%E5%9C%B3%E7%A1%AE%E8%AF%8A%E7%97%85%E4%BE%8B%E4%B8%AA%E6%A1%88%E6%B1%87%E6%80%BB%EF%BC%881-379%EF%BC%89&articleid=28428494&type=1&tag=1&url=http://static.scms.sztv.com.cn/ysz/zx/tj/28428494.shtml&logo=http://static.scms.sztv.com.cn/ysz/upload/Image/mrtp/2020/02/03/1_e12d3ec98ac24d879dbb9cca87d6f562.jpg&share=true)

[http://wjw.sz.gov.cn/yqxx/202002/t20200201\\_18994688.htm](http://wjw.sz.gov.cn/yqxx/202002/t20200201_18994688.htm)

30 [http://static.scms.sztv.com.cn/ysz/zx/tj/28428494.shtml?title=%E6%B7%B1%E5%9C%B3%E7%A1%AE%E8%AF%8A%E7%97%85%E4%BE%8B%E4%B8%AA%E6%A1%88%E6%B1%87%E6%80%BB%EF%BC%881-379%EF%BC%89&articleid=28428494&type=1&tag=1&url=http://static.scms.sztv.com.cn/ysz/zx/tj/28428494.shtml&logo=http://static.scms.sztv.com.cn/ysz/upload/Image/mrtp/2020/02/03/1\\_e12d3ec98ac24d879dbb9cca87d6f562.jpg&share=true](http://static.scms.sztv.com.cn/ysz/zx/tj/28428494.shtml?title=%E6%B7%B1%E5%9C%B3%E7%A1%AE%E8%AF%8A%E7%97%85%E4%BE%8B%E4%B8%AA%E6%A1%88%E6%B1%87%E6%80%BB%EF%BC%881-379%EF%BC%89&articleid=28428494&type=1&tag=1&url=http://static.scms.sztv.com.cn/ysz/zx/tj/28428494.shtml&logo=http://static.scms.sztv.com.cn/ysz/upload/Image/mrtp/2020/02/03/1_e12d3ec98ac24d879dbb9cca87d6f562.jpg&share=true)

[http://wjw.sz.gov.cn/yqxx/202002/t20200202\\_18995441.htm](http://wjw.sz.gov.cn/yqxx/202002/t20200202_18995441.htm)

31 [http://static.scms.sztv.com.cn/ysz/zx/tj/28428494.shtml?title=%E6%B7%B1%E5%9C%B3%E7%A1%AE%E8%AF%8A%E7%97%85%E4%BE%8B%E4%B8%AA%E6%A1%88%E6%B1%87%E6%80%BB%EF%BC%881-379%EF%BC%89&articleid=28428494&type=1&tag=1&url=http://static.scms.sztv.com.cn/ysz/zx/tj/28428494.shtml&logo=http://static.scms.sztv.com.cn/ysz/upload/Image/mrtp/2020/02/03/1\\_e12d3ec98ac24d879dbb9cca87d6f562.jpg&share=true](http://static.scms.sztv.com.cn/ysz/zx/tj/28428494.shtml?title=%E6%B7%B1%E5%9C%B3%E7%A1%AE%E8%AF%8A%E7%97%85%E4%BE%8B%E4%B8%AA%E6%A1%88%E6%B1%87%E6%80%BB%EF%BC%881-379%EF%BC%89&articleid=28428494&type=1&tag=1&url=http://static.scms.sztv.com.cn/ysz/zx/tj/28428494.shtml&logo=http://static.scms.sztv.com.cn/ysz/upload/Image/mrtp/2020/02/03/1_e12d3ec98ac24d879dbb9cca87d6f562.jpg&share=true)

[http://wjw.sz.gov.cn/yqxx/202002/t20200202\\_18996070.htm](http://wjw.sz.gov.cn/yqxx/202002/t20200202_18996070.htm)

32 [http://static.scms.sztv.com.cn/ysz/zx/tj/28428494.shtml?title=%E6%B7%B1%E5%9C%B3%E7%A1%AE%E8%AF%8A%E7%97%85%E4%BE%8B%E4%B8%AA%E6%A1%88%E6%B1%87%E6%80%BB%EF%BC%881-379%EF%BC%89&articleid=28428494&type=1&tag=1&url=http://static.scms.sztv.com.cn/ysz/zx/tj/28428494.shtml&logo=http://static.scms.sztv.com.cn/ysz/upload/Image/mrtp/2020/02/03/1\\_e12d3ec98ac24d879dbb9cca87d6f562.jpg&share=true](http://static.scms.sztv.com.cn/ysz/zx/tj/28428494.shtml?title=%E6%B7%B1%E5%9C%B3%E7%A1%AE%E8%AF%8A%E7%97%85%E4%BE%8B%E4%B8%AA%E6%A1%88%E6%B1%87%E6%80%BB%EF%BC%881-379%EF%BC%89&articleid=28428494&type=1&tag=1&url=http://static.scms.sztv.com.cn/ysz/zx/tj/28428494.shtml&logo=http://static.scms.sztv.com.cn/ysz/upload/Image/mrtp/2020/02/03/1_e12d3ec98ac24d879dbb9cca87d6f562.jpg&share=true)

[http://wjw.sz.gov.cn/yqxx/202002/t20200205\\_18998915.htm](http://wjw.sz.gov.cn/yqxx/202002/t20200205_18998915.htm)

33 [http://static.scms.sztv.com.cn/ysz/zx/tj/28428494.shtml?title=%E6%B7%B1%E5%9C%B3%E7%A1%AE%E8%AF%8A%E7%97%85%E4%BE%8B%E4%B8%AA%E6%A1%88%E6%B1%87%E6%80%BB%EF%BC%881-379%EF%BC%89&articleid=28428494&type=1&tag=1&url=http://static.scms.sztv.com.cn/ysz/zx/tj/28428494.shtml&logo=http://static.scms.sztv.com.cn/ysz/upload/Image/mrtp/2020/02/03/1\\_e12d3ec98ac24d879dbb9cca87d6f562.jpg&share=true](http://static.scms.sztv.com.cn/ysz/zx/tj/28428494.shtml?title=%E6%B7%B1%E5%9C%B3%E7%A1%AE%E8%AF%8A%E7%97%85%E4%BE%8B%E4%B8%AA%E6%A1%88%E6%B1%87%E6%80%BB%EF%BC%881-379%EF%BC%89&articleid=28428494&type=1&tag=1&url=http://static.scms.sztv.com.cn/ysz/zx/tj/28428494.shtml&logo=http://static.scms.sztv.com.cn/ysz/upload/Image/mrtp/2020/02/03/1_e12d3ec98ac24d879dbb9cca87d6f562.jpg&share=true)

[http://wjw.sz.gov.cn/yqxx/202002/t20200205\\_19000593.htm](http://wjw.sz.gov.cn/yqxx/202002/t20200205_19000593.htm)

34 [http://static.scms.szstv.com.cn/ysz/zx/tj/28428494.shtml?title=%E6%B7%B1%E5%9C%B3%E7%A1%AE%E8%AF%8A%E7%97%85%E4%BE%8B%E4%B8%AA%E6%A1%88%E6%B1%87%E6%80%BB%EF%BC%881-379%EF%BC%89&articleid=28428494&type=1&tag=1&url=http://static.scms.szstv.com.cn/ysz/zx/tj/28428494.shtml&logo=http://static.scms.szstv.com.cn/ysz/upload/Image/mrtp/2020/02/03/1\\_e12d3ec98ac24d879dbb9cca87d6f562.jpg&share=true](http://static.scms.szstv.com.cn/ysz/zx/tj/28428494.shtml?title=%E6%B7%B1%E5%9C%B3%E7%A1%AE%E8%AF%8A%E7%97%85%E4%BE%8B%E4%B8%AA%E6%A1%88%E6%B1%87%E6%80%BB%EF%BC%881-379%EF%BC%89&articleid=28428494&type=1&tag=1&url=http://static.scms.szstv.com.cn/ysz/zx/tj/28428494.shtml&logo=http://static.scms.szstv.com.cn/ysz/upload/Image/mrtp/2020/02/03/1_e12d3ec98ac24d879dbb9cca87d6f562.jpg&share=true)

[http://wjw.sz.gov.cn/yqxx/202002/t20200205\\_19000593.htm](http://wjw.sz.gov.cn/yqxx/202002/t20200205_19000593.htm)

35 [http://static.scms.szstv.com.cn/ysz/zx/tj/28428494.shtml?title=%E6%B7%B1%E5%9C%B3%E7%A1%AE%E8%AF%8A%E7%97%85%E4%BE%8B%E4%B8%AA%E6%A1%88%E6%B1%87%E6%80%BB%EF%BC%881-379%EF%BC%89&articleid=28428494&type=1&tag=1&url=http://static.scms.szstv.com.cn/ysz/zx/tj/28428494.shtml&logo=http://static.scms.szstv.com.cn/ysz/upload/Image/mrtp/2020/02/03/1\\_e12d3ec98ac24d879dbb9cca87d6f562.jpg&share=true](http://static.scms.szstv.com.cn/ysz/zx/tj/28428494.shtml?title=%E6%B7%B1%E5%9C%B3%E7%A1%AE%E8%AF%8A%E7%97%85%E4%BE%8B%E4%B8%AA%E6%A1%88%E6%B1%87%E6%80%BB%EF%BC%881-379%EF%BC%89&articleid=28428494&type=1&tag=1&url=http://static.scms.szstv.com.cn/ysz/zx/tj/28428494.shtml&logo=http://static.scms.szstv.com.cn/ysz/upload/Image/mrtp/2020/02/03/1_e12d3ec98ac24d879dbb9cca87d6f562.jpg&share=true)

[http://wjw.sz.gov.cn/yqxx/202002/t20200208\\_19003910.htm](http://wjw.sz.gov.cn/yqxx/202002/t20200208_19003910.htm)

36 [http://static.scms.szstv.com.cn/ysz/zx/tj/28428494.shtml?title=%E6%B7%B1%E5%9C%B3%E7%A1%AE%E8%AF%8A%E7%97%85%E4%BE%8B%E4%B8%AA%E6%A1%88%E6%B1%87%E6%80%BB%EF%BC%881-379%EF%BC%89&articleid=28428494&type=1&tag=1&url=http://static.scms.szstv.com.cn/ysz/zx/tj/28428494.shtml&logo=http://static.scms.szstv.com.cn/ysz/upload/Image/mrtp/2020/02/03/1\\_e12d3ec98ac24d879dbb9cca87d6f562.jpg&share=true](http://static.scms.szstv.com.cn/ysz/zx/tj/28428494.shtml?title=%E6%B7%B1%E5%9C%B3%E7%A1%AE%E8%AF%8A%E7%97%85%E4%BE%8B%E4%B8%AA%E6%A1%88%E6%B1%87%E6%80%BB%EF%BC%881-379%EF%BC%89&articleid=28428494&type=1&tag=1&url=http://static.scms.szstv.com.cn/ysz/zx/tj/28428494.shtml&logo=http://static.scms.szstv.com.cn/ysz/upload/Image/mrtp/2020/02/03/1_e12d3ec98ac24d879dbb9cca87d6f562.jpg&share=true)

[http://wjw.sz.gov.cn/yqxx/202002/t20200208\\_19003910.htm](http://wjw.sz.gov.cn/yqxx/202002/t20200208_19003910.htm)

37 [http://ah.ifeng.com/a/20200131/8163541\\_0.shtml](http://ah.ifeng.com/a/20200131/8163541_0.shtml)

38 [http://ah.ifeng.com/a/20200131/8163541\\_0.shtml](http://ah.ifeng.com/a/20200131/8163541_0.shtml)

39 [http://ah.ifeng.com/a/20200131/8163541\\_0.shtml](http://ah.ifeng.com/a/20200131/8163541_0.shtml)

40 [http://ah.ifeng.com/a/20200131/8163541\\_0.shtml](http://ah.ifeng.com/a/20200131/8163541_0.shtml)

41 [http://ah.ifeng.com/a/20200131/8163541\\_0.shtml](http://ah.ifeng.com/a/20200131/8163541_0.shtml)

42 [http://ah.ifeng.com/a/20200131/8163541\\_0.shtml](http://ah.ifeng.com/a/20200131/8163541_0.shtml)

43 [http://ah.ifeng.com/a/20200131/8163541\\_0.shtml](http://ah.ifeng.com/a/20200131/8163541_0.shtml)

44 [http://ah.ifeng.com/a/20200131/8163541\\_0.shtml](http://ah.ifeng.com/a/20200131/8163541_0.shtml)

45 <http://nyws.nanyang.gov.cn/gzdt/362568.htm>

<http://nyws.nanyang.gov.cn/gzdt/358648.htm>

46 <http://nyws.nanyang.gov.cn/gzdt/362262.htm>

<http://nyws.nanyang.gov.cn/gzdt/359030.htm>

<http://nyws.nanyang.gov.cn/gzdt/358648.htm>

47 <http://nyws.nanyang.gov.cn/gzdt/361646.htm>  
<http://nyws.nanyang.gov.cn/gzdt/359030.htm>  
<http://nyws.nanyang.gov.cn/gzdt/358648.htm>

48 <http://nyws.nanyang.gov.cn/gzdt/360988.htm>  
<http://nyws.nanyang.gov.cn/gzdt/358486.htm>

49 <http://nyws.nanyang.gov.cn/gzdt/360511.htm>  
<http://nyws.nanyang.gov.cn/gzdt/358648.htm>

50 <http://nyws.nanyang.gov.cn/gzdt/360069.htm>  
<http://nyws.nanyang.gov.cn/gzdt/359573.htm>

51 <http://nyws.nanyang.gov.cn/gzdt/359030.htm>  
<http://nyws.nanyang.gov.cn/gzdt/358648.htm>

52 <http://nyws.nanyang.gov.cn/gzdt/360069.htm>  
<http://nyws.nanyang.gov.cn/gzdt/359573.htm>

53 <http://nyws.nanyang.gov.cn/gzdt/359241.htm>  
<http://nyws.nanyang.gov.cn/gzdt/359573.htm>

54 <http://nyws.nanyang.gov.cn/gzdt/358648.htm>

55 [http://sxwjw.shaanxi.gov.cn/art/2020/1/23/art\\_9\\_67371.html](http://sxwjw.shaanxi.gov.cn/art/2020/1/23/art_9_67371.html)  
[http://sxwjw.shaanxi.gov.cn/art/2020/1/28/art\\_9\\_67512.html](http://sxwjw.shaanxi.gov.cn/art/2020/1/28/art_9_67512.html)

56 [http://sxwjw.shaanxi.gov.cn/art/2020/1/28/art\\_9\\_67512.html](http://sxwjw.shaanxi.gov.cn/art/2020/1/28/art_9_67512.html)

57 [http://sxwjw.shaanxi.gov.cn/art/2020/1/29/art\\_9\\_67531.html](http://sxwjw.shaanxi.gov.cn/art/2020/1/29/art_9_67531.html)  
[http://sxwjw.shaanxi.gov.cn/art/2020/1/27/art\\_9\\_67483.html](http://sxwjw.shaanxi.gov.cn/art/2020/1/27/art_9_67483.html)

58 [http://sxwjw.shaanxi.gov.cn/art/2020/1/31/art\\_9\\_67572.html](http://sxwjw.shaanxi.gov.cn/art/2020/1/31/art_9_67572.html)  
[http://sxwjw.shaanxi.gov.cn/art/2020/2/1/art\\_9\\_67591.html](http://sxwjw.shaanxi.gov.cn/art/2020/2/1/art_9_67591.html)  
[http://sxwjw.shaanxi.gov.cn/art/2020/1/29/art\\_9\\_67531.html](http://sxwjw.shaanxi.gov.cn/art/2020/1/29/art_9_67531.html)

59 [http://sxwjw.shaanxi.gov.cn/art/2020/2/3/art\\_9\\_67666.html](http://sxwjw.shaanxi.gov.cn/art/2020/2/3/art_9_67666.html)  
[http://sxwjw.shaanxi.gov.cn/art/2020/2/1/art\\_9\\_67591.html](http://sxwjw.shaanxi.gov.cn/art/2020/2/1/art_9_67591.html)  
[http://sxwjw.shaanxi.gov.cn/art/2020/1/29/art\\_9\\_67531.html](http://sxwjw.shaanxi.gov.cn/art/2020/1/29/art_9_67531.html)

60 [http://sxwjw.shaanxi.gov.cn/art/2020/2/2/art\\_9\\_67618.html](http://sxwjw.shaanxi.gov.cn/art/2020/2/2/art_9_67618.html)  
[http://sxwjw.shaanxi.gov.cn/art/2020/2/7/art\\_9\\_67829.html](http://sxwjw.shaanxi.gov.cn/art/2020/2/7/art_9_67829.html)

61 [http://sxwjw.shaanxi.gov.cn/art/2020/2/2/art\\_9\\_67618.html](http://sxwjw.shaanxi.gov.cn/art/2020/2/2/art_9_67618.html)  
[http://sxwjw.shaanxi.gov.cn/art/2020/1/25/art\\_9\\_67412.html](http://sxwjw.shaanxi.gov.cn/art/2020/1/25/art_9_67412.html)

http://sxwjw.shaanxi.gov.cn/art/2020/1/26/art\_9\_67449.html  
62 http://sxwjw.shaanxi.gov.cn/art/2020/2/3/art\_9\_67666.html  
http://sxwjw.shaanxi.gov.cn/art/2020/1/25/art\_9\_67412.html  
http://sxwjw.shaanxi.gov.cn/art/2020/1/26/art\_9\_67449.html  
63 http://sxwjw.shaanxi.gov.cn/art/2020/2/1/art\_9\_67591.html  
http://sxwjw.shaanxi.gov.cn/art/2020/1/26/art\_9\_67449.html  
http://sxwjw.shaanxi.gov.cn/art/2020/2/2/art\_9\_67618.html  
64 http://sxwjw.shaanxi.gov.cn/art/2020/1/31/art\_9\_67572.html  
http://sxwjw.shaanxi.gov.cn/art/2020/2/3/art\_9\_67666.html  
65 http://sxwjw.shaanxi.gov.cn/art/2020/1/31/art\_9\_67572.html  
http://sxwjw.shaanxi.gov.cn/art/2020/2/5/art\_9\_67765.html  
66 http://sxwjw.shaanxi.gov.cn/art/2020/2/3/art\_9\_67666.html  
http://sxwjw.shaanxi.gov.cn/art/2020/1/31/art\_9\_67572.html  
http://sxwjw.shaanxi.gov.cn/art/2020/1/29/art\_9\_67531.html  
67 http://sxwjw.shaanxi.gov.cn/art/2020/2/3/art\_9\_67666.html  
http://sxwjw.shaanxi.gov.cn/art/2020/2/5/art\_9\_67765.html  
68 http://sxwjw.shaanxi.gov.cn/art/2020/2/5/art\_9\_67765.html  
http://sxwjw.shaanxi.gov.cn/art/2020/2/1/art\_9\_67591.html  
69 http://sxwjw.shaanxi.gov.cn/art/2020/2/4/art\_9\_67724.html  
http://sxwjw.shaanxi.gov.cn/art/2020/2/5/art\_9\_67765.html  
70 http://sxwjw.shaanxi.gov.cn/art/2020/1/29/art\_9\_67531.html  
http://sxwjw.shaanxi.gov.cn/art/2020/1/31/art\_9\_67572.html  
http://sxwjw.shaanxi.gov.cn/art/2020/2/8/art\_9\_67873.html  
71 http://sxwjw.shaanxi.gov.cn/art/2020/2/2/art\_9\_67618.html  
http://sxwjw.shaanxi.gov.cn/art/2020/2/10/art\_9\_67901.html  
72 http://sxwjw.shaanxi.gov.cn/art/2020/2/1/art\_9\_67591.html  
http://sxwjw.shaanxi.gov.cn/art/2020/2/7/art\_9\_67829.html  
http://sxwjw.shaanxi.gov.cn/art/2020/2/11/art\_9\_67931.html  
73 http://sxwjw.shaanxi.gov.cn/art/2020/2/13/art\_9\_67993.html  
http://sxwjw.shaanxi.gov.cn/art/2020/2/19/art\_9\_68128.html  
74 http://wjw.sz.gov.cn/yqxx/202001/t20200124\_18992235.htm

75 [https://zh.wikipedia.org/wiki/2019%E5%86%A0%E7%8A%B6%E7%97%85%E6%AF%92%E7%97%85%E6%97%A5%E6%9C%AC%E5%9B%BD%E5%86%85%E7%97%85%E4%BE%8B\\_\(2020%E5%B9%B43%E6%9C%88%E4%B8%8A%E6%97%AC\)](https://zh.wikipedia.org/wiki/2019%E5%86%A0%E7%8A%B6%E7%97%85%E6%AF%92%E7%97%85%E6%97%A5%E6%9C%AC%E5%9B%BD%E5%86%85%E7%97%85%E4%BE%8B_(2020%E5%B9%B43%E6%9C%88%E4%B8%8A%E6%97%AC))

76 [https://zh.wikipedia.org/wiki/2019%E5%86%A0%E7%8A%B6%E7%97%85%E6%AF%92%E7%97%85%E6%97%A5%E6%9C%AC%E5%9B%BD%E5%86%85%E7%97%85%E4%BE%8B\\_\(2020%E5%B9%B43%E6%9C%88%E4%B8%AD%E6%97%AC\)](https://zh.wikipedia.org/wiki/2019%E5%86%A0%E7%8A%B6%E7%97%85%E6%AF%92%E7%97%85%E6%97%A5%E6%9C%AC%E5%9B%BD%E5%86%85%E7%97%85%E4%BE%8B_(2020%E5%B9%B43%E6%9C%88%E4%B8%AD%E6%97%AC))

77 <https://www.msn.com/zh-tw/news/living/%E5%8F%B0%E7%81%A3%E6%96%B0%E5%A2%9E5%E7%A2%BA%E8%A8%BA%EF%BC%81%E3%80%8C%E7%AC%AC39%E4%BE%8B%E6%97%85%E9%81%8A%E5%8F%B2%E3%80%8D%E6%9B%9D%E5%85%89%E5%85%A8%E9%A9%9A%E5%91%86%E5%A4%AA%E9%BB%91%E6%9A%97%E4%BA%86/ar-BB10xYkD>

[https://www.upmedia.mg/news\\_info.php?SerialNo=82685](https://www.upmedia.mg/news_info.php?SerialNo=82685)

---
