# Supplementary material for: Temporal dynamics in viral shedding and transmissibility of COVID-19
Source: Springer Nature journal article supplement (doi:10.1038/s41591-020-0869-5), 2020-04-15
Supplement: 41591_2020_869_MOESM3_ESM.xlsx [file 41591_2020_869_MOESM3_ESM.xlsx]

## Sheet: Fig2c_data
ID	x.lb	x.ub	y
1	2020-01-17	2020-01-17	2020-01-20
2	2020-01-31	2020-01-31	2020-02-06
3	2020-01-29	2020-01-29	2020-02-01
4	2020-01-29	2020-01-29	2020-02-05
5	2020-01-25	2020-01-25	2020-01-28
6	2020-01-29	2020-01-29	2020-02-01
7	2020-01-29	2020-01-29	2020-02-01
8	2020-01-30	2020-01-30	2020-02-03
9	2020-02-12	2020-02-12	2020-02-12
10	2020-02-13	2020-02-13	2020-02-25
11	2020-02-13	2020-02-13	2020-02-29
12	2020-02-12	2020-02-12	2020-02-16
13	2020-02-13	2020-02-13	2020-02-15
14	2020-02-13	2020-02-13	2020-02-17
15	2020-02-17	2020-02-17	2020-02-19
16	2020-02-17	2020-02-17	2020-02-19
17	2020-02-15	2020-02-15	2020-02-17
18	2020-02-15	2020-02-15	2020-02-17
19	2020-02-20	2020-02-20	2020-02-20
20	2020-02-03	2020-02-03	2020-02-17
21	2020-02-03	2020-02-09	2020-02-24
22	2020-02-13	2020-02-13	2020-02-25
23	2020-01-25	2020-01-25	2020-01-26
24	2020-01-21	2020-01-21	2020-01-27
25	2020-02-06	2020-02-06	2020-02-24
26	2020-01-22	2020-01-23	2020-01-28
27	2020-01-28	2020-01-28	2020-01-31
28	2020-01-12	2020-01-15	2020-01-22
29	2020-01-22	2020-01-22	2020-01-28
30	2020-01-18	2020-01-18	2020-01-24
31	2020-01-04	2020-01-12	2020-01-25
32	2020-01-24	2020-01-24	2020-01-25
33	2020-01-17	2020-01-17	2020-01-28
34	2020-01-26	2020-01-26	2020-01-30
35	2020-01-19	2020-01-19	2020-02-04
36	2020-01-29	2020-01-29	2020-02-05
37	2020-01-10	2020-01-10	2020-01-15
38	2020-01-10	2020-01-10	2020-01-17
39	2020-01-15	2020-01-15	2020-01-24
40	2020-01-22	2020-01-22	2020-01-24
41	2020-01-22	2020-01-22	2020-01-25
42	2020-01-22	2020-01-22	2020-01-24
43	2020-01-22	2020-01-22	2020-01-22
44	2020-01-22	2020-01-22	2020-01-24
45	2020-01-25	2020-01-25	2020-02-03
46	2020-01-29	2020-01-29	2020-02-01
47	2020-01-29	2020-01-29	2020-02-06
48	2020-01-29	2020-01-29	2020-02-03
49	2020-01-23	2020-01-23	2020-02-03
50	2020-01-30	2020-01-30	2020-02-02
51	2020-01-14	2020-01-15	2020-01-24
52	2020-01-24	2020-01-24	2020-02-01
53	2020-01-17	2020-01-17	2020-01-31
54	2020-01-22	2020-01-22	2020-01-19
55	2020-01-16	2020-01-16	2020-01-25
56	2020-01-18	2020-01-18	2020-01-22
57	2020-01-18	2020-01-18	2020-01-22
58	2020-01-18	2020-01-18	2020-01-25
59	2020-01-18	2020-01-18	2020-01-25
60	2020-01-29	2020-01-29	2020-02-03
61	2020-01-21	2020-01-23	2020-01-27
62	2020-01-21	2020-01-23	2020-01-27
63	2020-01-10	2020-01-29	2020-01-22
64	2020-01-24	2020-01-24	2020-01-25
65	2020-01-24	2020-01-24	2020-01-31
66	2020-01-23	2020-01-26	2020-01-30
67	2020-01-30	2020-01-30	2020-02-01
68	2020-01-28	2020-01-28	2020-01-24
69	2020-01-26	2020-01-26	2020-02-02
70	2020-01-27	2020-01-27	2020-01-31
71	2020-01-24	2020-01-24	2020-02-01
72	2020-01-28	2020-02-03	2020-02-08
73	2020-02-09	2020-02-09	2020-02-12
74	2020-01-01	2020-01-04	2020-01-08
75	2020-02-24	2020-02-24	2020-02-29
76	2020-02-29	2020-02-29	2020-03-04
77	2020-02-20	2020-02-20	2020-03-03
